# Supplementary material for: Electrochemical sensing of cocaine in real samples based on electrodeposited biomimetic affinity ligands
Source: Royal Society of Chemistry journal article supplement (doi:10.1039/c9an00618d), 2019-01-01
Supplement: c9an00618d1.pdf [file c9an00618d1.pdf]

## Electronic Supplementary Information

### Electrochemical sensing of cocaine in real samples based on electrodeposited biomimetic affinity ligands

Anca Florea<sup>a</sup>, Todd Cowen<sup>b</sup>, Sergey Piletsky<sup>b</sup>, Karolien De Wael<sup>a\*</sup>

<sup>a</sup> University of Antwerp, Department of Chemistry, Groenenborgerlaan 171, B-2020, Belgium

<sup>b</sup> University of Leicester, Department of Chemistry, LE1 7RH, UK

\*Corresponding author, e-mail address: [karolien.dewael@uantwerpen.be](mailto:karolien.dewael@uantwerpen.be)

#### Table of contents

|                                                                                                                  |     |
|------------------------------------------------------------------------------------------------------------------|-----|
| <b>Table S1.</b> Hierarchy of relative binding energies for cocaine-electropolymerizable monomers screening..... | S-2 |
|------------------------------------------------------------------------------------------------------------------|-----|

**Table S1.** Hierarchy of relative binding energies for cocaine-electropolymerizable monomers screening.

| Monomer                | Chemical structure                                                                  | Binding energy (kJ mol <sup>-1</sup> ) |
|------------------------|-------------------------------------------------------------------------------------|----------------------------------------|
| Orto-phenylene-diamine | 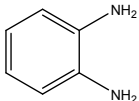   | -190.12                                |
| Para-aminobenzoic acid |    | -114.99                                |
| Pyrrole carbohydrazide |    | -110.71                                |
| Aniline                |    | -104.39                                |
| Thioaniline            |    | -98.28                                 |
| Pyrrole                |  | -57.97                                 |

The results of the computational modelling show that orto-phenylene-diamine and para-aminobenzoic acid are the best candidates for molecular imprinting having the highest affinity for cocaine binding and thus ensuring a high probability of imprinting success during polymerization. Experimental work performed with the two monomers in our previous work<sup>37</sup> showed that, even though orto-phenylene-diamine shows a higher binding score, from the application point of view in electrochemical sensors para-aminobenzoic acid shows better results in terms of cocaine peak current intensity, having a higher conductivity. Thus, para-amino-benzoic was selected as monomer for further experiments.
